---

## Commentary

---

# Plasticity and stability in neuronal output *via* changes in intrinsic excitability: it's what's inside that counts

David J. Schulz

*Biological Sciences, University of Missouri–Columbia, Columbia, MO 65211, USA*

e-mail: SchulzD@missouri.edu

*Accepted 2 October 2006*

### Summary

**The nervous system faces an extremely difficult task. It must be flexible, both during development and in adult life, so that it can respond to a variety of environmental demands and produce adaptive behavior. At the same time the nervous system must be stable, so that the neural circuits that produce behavior function throughout the lifetime of the animal and that changes produced by learning endure. We are only beginning to understand how neural networks strike a balance between altering individual neurons in the name of plasticity, while maintaining long-term stability in neural system function. The balance of this plasticity and stability in neural**

**networks undoubtedly plays a critical role in the normal functioning of the nervous system. While mechanisms of synaptic plasticity have garnered extensive study over the past three decades, it is only recently that more attention has been turned to plasticity of intrinsic excitability as a key player in neural network function. This review will focus on this emerging area of research that undoubtedly will contribute a great deal to our understanding of the functionality of the nervous system.**

Key words: neuronal excitability, ion channels, plasticity.

### Introduction

Intrinsic excitability refers to the propensity of a neuron to fire action potentials when exposed to an input signal, be it pre-synaptic activity or a direct input from a particular sensory modality. In other words, the intrinsic excitability of neurons is responsible for the translation of synaptic input to the particular output function of a given neuron. Neuronal excitability is directly attributable to the suite of ion channels inserted into the membrane of the cell, as well as the biochemical properties and kinetics of those channels. Because of their fundamental role in generating neuronal output, it is not surprising that alterations in the properties, spatial distribution, or abundance of these ion channels can result in considerable plasticity for neurons and the networks to which they belong.

Plasticity in intrinsic excitability may play multiple important roles in the functioning nervous system. For example, increasing the likelihood that an action potential will be triggered by summed synaptic inputs is a *de facto* mechanism for strengthening connections between cells independent of synaptic strength (Fig. 1A). Thus mechanisms that alter neuronal excitability can lead to plasticity in responses to synaptic stimulation, ultimately affecting processes such as learning and memory and other activity-dependent forms of neural plasticity.

Alternatively, alterations in intrinsic excitability also can have a stabilizing influence on neural function. Some neurons may respond to changes in synaptic input or endogenous activity by altering their excitability to maintain a given firing pattern or firing rate (Fig. 1B). For example, a pacemaker neuron that experiences a decrease in synaptic drive may independently increase its own excitability by up-regulating depolarizing conductances in order to maintain a fixed level of firing output. This 'homeostatic plasticity' has more recently been implicated as a mechanism of stabilizing neuronal function.

Finally, it is possible that changes occur in the intrinsic properties of neurons in networks with disrupted innervation as a result of injury or disease. Such alterations may result in activity-dependent changes in the intrinsic properties of the cells in these networks, which then go on to form functionally different, isolated networks. It is not clear what the long-term effects of changes in excitability are in these networks. However, as our focus for treatments for such problems as spinal cord injury are geared towards re-establishing contact between higher systems and peripheral motor networks, it behooves us to understand how the distal networks have been altered as a result of deprivation of descending inputs.

It is these three aspects of plasticity in neuronal excitability

in mature nervous systems that will be discussed in this review: long-term potentiation and depression of intrinsic excitability, homeostatic plasticity of neuronal excitability, and changes in excitability following perturbation of afferent input. It should be noted that a great deal of plasticity in intrinsic properties is found in the developing nervous system (see Moody and Bosma, 2005). This developmental aspect of the story, while of great importance, is beyond the scope of this review.

### Learning and long-term potentiation and depression of intrinsic excitability

Synaptic plasticity and long-term alteration of synaptic strength have been at the heart of research into the cellular mechanisms of learning and memory for three decades. Yet while synaptic activity is responsible for the conveyance of information between neurons, the 'decision' of what to do with that information is the result of integrated activity in the dendrites and soma and ultimately the generation (or not) of action potentials in the spike initiation zone. Therefore, the intrinsic excitability of a neuron is critical for determining the ultimate output of any synaptic input. Thus the question becomes whether action potential generation is a static

component of synaptic throughput with no bearing on mechanisms of learning and memory, or whether experience-dependent changes in neuronal activity also may be the result of modification of intrinsic excitability.

Some of the best evidence that learning may in part be the result of changes in neuronal excitability come from conditioning paradigms. One of the first examples of plasticity in intrinsic excitability as a function of behavioral training (and presumably *via* synaptic drive due to this training) was described in the nudibranch mollusk *Hermissenda crassicornis*. Persistent increases in intrinsic excitability of type B photoreceptors can be elicited *via* pairing of light and rotation stimuli (Alkon, 1984). This change is due, at least in part, to a decrease of the transient  $K^+$  current ( $I_A$ ). Decreases in hyperpolarizing  $K^+$  currents such as  $I_A$  act to increase neuronal excitability. These increases in excitability in *Hermissenda* photoreceptors persist for days or weeks, thus may have long-term effects on learning and memory. Similar changes in intrinsic excitability are known from other invertebrate conditioning paradigms, such as conditioned pneumostome closure in the snail *Helix* (Gainutdinov et al., 1998) and conditioned gill/siphon withdrawal in *Aplysia* (Antonov et al., 2001).

While these correlative examples of changes in intrinsic excitability suggest that this mechanism plays a role in learning, it is not clear whether changes in excitability represent a functional portion

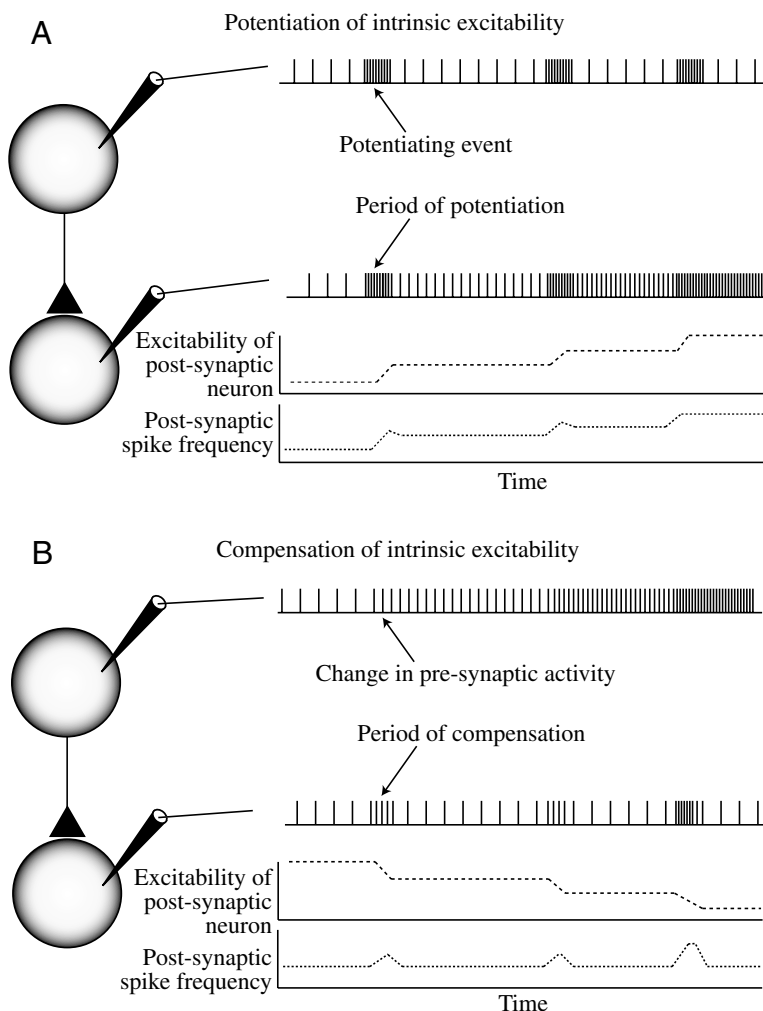

Fig. 1. Examples of plasticity in intrinsic neuronal excitability. (A) Diagram illustrating the concept of potentiation of intrinsic excitability. The circles represent two different neurons connected by an excitatory synapse (triangle). In the case of potentiation of excitability, one form of plasticity in intrinsic properties of neurons, activity in the pre-synaptic neuron potentiates the connection with the post-synaptic neuron. This potentiation is the result of an increase in the overall excitability of the post-synaptic neuron independent of changes in synaptic strength. One possible mechanism for this change in excitability is a decrease in action potential threshold. The result of this increased excitability is an increase in the input-output function of the postsynaptic cell: more spikes are elicited post-synaptically for the same amount of pre-synaptic input. This results in a *de facto* increase in synaptic strength mediated by changes in the intrinsic excitability of the post-synaptic neuron. Examples of this kind of plasticity have recently been published (Cudmore and Turrigiano, 2004; Li et al., 2004; Xu et al., 2005). (B) Diagram illustrating the concept of compensatory changes in excitability leading to conserved neuronal output. In this case, the post-synaptic neuron maintains a constant level of spiking activity as a result of compensatory decreases in excitability triggered by increased pre-synaptic activity. The outcome is a constantly maintained level of spiking activity in the post-synaptic cell, which could be the result of an increased action potential threshold, for example. For examples of this kind of plasticity, see recent publications (Aptowicz et al., 2004; Brickley et al., 2001; van Welie et al., 2004).

of the memory trace or simply play a facilitative role in formation of memory. For example, during eye-blink conditioning in the rabbit (*Oryctolagus cuniculus*), a puff of air that elicits a reflex eye blink is coupled to a neutral stimulus (such as a sound tone) until the neutral stimulus itself is able to elicit the blink reflex. Pyramidal cells in areas CA1 and CA3 of the hippocampus show changes in intrinsic excitability 24 h after this conditioning, including increased spiking in response to current injection and decreases in the amplitude of the afterhyperpolarization evoked by bursts of action potentials (Moyer, Jr et al., 1996; Thompson et al., 1996). Yet after 7 days, while the memory trace of the conditioning is still intact (and indeed can last for months), the changes in excitability recorded after 24 h are no longer detectable (Moyer, Jr et al., 1996). These results suggest, at least in this system, that the increase in excitability does not form part of the memory trace itself but rather may facilitate the formation of a synaptic memory trace by increasing the likelihood of the induction of synaptic long-term potentiation in the hippocampus or elsewhere (Zhang and Linden, 2003).

In the past 5 years, many reports of increases in neuronal excitability in response to high frequency synaptic stimulation have emerged. This phenomenon, collectively known as long-term potentiation of intrinsic excitability (LTP-IE), has been reported in cells of layer V visual cortex (Cudmore and Turrigiano, 2004), granule cells (Armano et al., 2000) and deep nuclear neurons of the cerebellum (Aizenman and Linden, 2000), and hippocampal CA1 neurons (Daoudal and Debanne, 2003; Xu et al., 2005), to name a few. Recently long-term depression of intrinsic excitability also has been reported in cultured hippocampal neurons and cells of the somatosensory cortex (Li et al., 2004). The mechanisms involved in altering excitability are as varied as the cell types implicated. These mechanisms include decreases in the magnitude and kinetics of A-type  $K^+$  currents (Frick et al., 2004), slowly inactivating  $K^+$  currents (Li et al., 2004), calcium-activated  $K^+$  currents (Sanchez-Andres and Alkon, 1991) and voltage-gated  $Na^+$  currents (Xu et al., 2005), and are thought to act through calcium-mediated activation of phosphorylation pathways (Cudmore and Turrigiano, 2004; Li et al., 2004; Xu et al., 2005).

While the discovery of numerous sites and mechanisms of LTP-IE has further implicated this phenomenon as playing a key role in neural plasticity, what are badly needed are investigations of the functional consequences of this plasticity. In addition to the aforementioned conditioning paradigms, one of the best examples of a functional role for regulation of intrinsic neuronal excitability comes from work in the optic tectum of *Xenopus* tadpoles (see Fig. 2). In freely swimming tadpoles, a persistent visual stimulation regime increases the excitability of neurons in the optic tectum (Aizenman et al., 2003) (Fig. 2A). This increase in excitability is due at least in part to an increase in the peak amplitude of voltage-gated  $Na^+$  current (Fig. 2B), and is correlated with (and perhaps initiated by) a subsequent decrease in the synaptic drive onto these cells (Aizenman et al., 2002). The end result is an overall shift in the

input–output relationship in these tectal neurons: tectal neurons with enhanced excitability exhibit enhanced responses to temporally coherent (i.e. bursts of) stimuli (Aizenman et al., 2003). Further, tectal neurons from intact animals subject to these stimulation protocols are more sensitive to subsequent visual stimuli, and yet these cells do not show changes in spontaneous activity (Fig. 2C). These data suggest that this enhancement of neuronal excitability plays a functional role by increasing signal-to-noise ratios for visual stimuli and thereby improve stimulus detection *in vivo*.

### Homeostatic plasticity and intrinsic excitability

The regulation of intrinsic excitability may exist in parallel to synaptic plasticity and act in concert to control the throughput of synaptic signals. Yet when one considers that neurons are constantly subject to various mechanisms of plasticity and modulation, it becomes clear that in the absence of some form of stabilizing activity cells rapidly would be pushed outside of the parameters for normal neuronal function. The question then becomes, how do cells maintain the flexibility to respond to changes in the environment, yet constrain this flexibility such that functionally relevant output is maintained?

Homeostatic processes are widespread throughout all living systems, and the nervous system is no exception. Individual neurons as well as neuronal networks must maintain levels of excitability and connectivity to ensure that consistent functional output is achieved. Evidence for such homeostatic mechanisms in neurons and neural circuits is steadily growing (Davis and Bezprozvanny, 2001; Turrigiano, 1999; Turrigiano and Nelson, 2004). For example, in both mice and *Drosophila*, the neuromuscular junction can compensate for decreased postsynaptic excitability by increasing presynaptic transmitter release to maintain a normal level of muscle depolarization (Petersen et al., 1997; Sandrock, Jr et al., 1997). Yet it is only more recently that homeostatic mechanisms involved in controlling intrinsic excitability have been investigated in detail. There are two lines of evidence that support the idea that ionic conductances are maintained in a homeostatic fashion to stabilize the excitability of a given neuron: measurements of endogenous membrane conductances, and manipulations that alter the excitability of a neuron.

It is often assumed that all neurons of the same cell type that produce similar output have identical intrinsic properties, both within an animal and across individuals. Yet recent theoretical work has argued that similar neuronal activity can be obtained from different combinations of membrane conductances (Golowasch et al., 2002; Liu et al., 1998; Prinz et al., 2003; Prinz et al., 2004). These theoretical studies are supported by recently published work measuring the variability of membrane conductances and the corresponding levels of ion channel expression in single identified neurons of the crab stomatogastric ganglion (Schulz et al., 2006). In lateral pyloric (LP) neurons, three- to fourfold inter-animal variability is seen for three potassium currents measured in two-electrode voltage

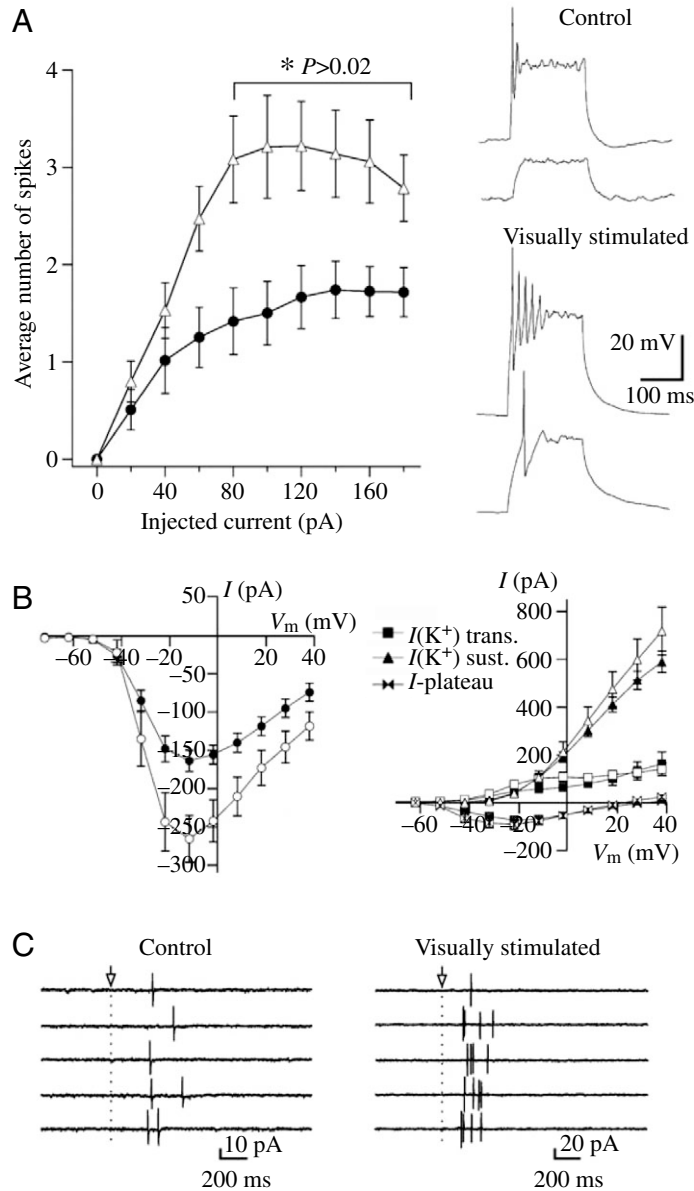

Fig. 2. Visually driven regulation of intrinsic neuronal excitability in *Xenopus* tectal neurons improves stimulus detection *in vivo*. (A) Tectal neurons from tadpoles exposed to a visual stimulation protocol show increased excitability in response to injected depolarizing current. Left: input-output relationships in response to square pulse depolarizations of varying amplitudes. Neurons from visually stimulated animals (open triangles;  $N=25$ ) show significantly more spiking activity in response to injected current than do controls (filled circles;  $N=20$ ). Right: representative recordings from these neurons showing the differences in response to current injection. (B) Increases in the excitability of tectal neurons are the result of changes in voltage-dependent  $\text{Na}^+$  currents.  $\text{Na}^+$  currents (left) but not  $\text{K}^+$  currents (right) show a significant increase in peak amplitude in visually stimulated animals. An increase in these  $\text{Na}^+$  currents, which are depolarizing and excitatory, would account for the increase in excitability seen in visually stimulated tadpoles. Open symbols represent recordings from visually stimulated neurons ( $N=46$ ), and closed symbols are controls ( $N=25$ ).  $\text{K}^+$  currents: trans, transient; sust, sustained;  $\text{Ca}^{2+}$  currents:  $I$ -plateau. (C) Increased excitability of tectal neurons improves visual stimulus detection in semi-intact tadpoles. Recordings of visually evoked field potentials were made from the tectum in control and stimulated tadpoles. The recordings shown represent five trials from a control cell, and five trials recorded from a cell in a tadpole previously subjected to the visual stimulation protocol. The neuron from the visually stimulated animal fires more action potentials than the control in response to a subsequently presented light stimulus (open arrow), indicating that the sensitivity to visual stimuli is increased in tadpoles with previous visual stimulation experience. Figure adapted from Aizenman et al. (Aizenman et al., 2003) and reproduced with permission.

clamp (Fig. 3B), even though the firing pattern of LP neurons is highly conserved from animal to animal (Fig. 3A). These same neurons showed a similar amount of variability in mRNA levels for the ion channels corresponding to these conductances (Fig. 3C), demonstrating that this variability exists at multiple functional levels, and is not simply an artifact of 'noise' in voltage clamp recordings (Fig. 3D). Presumably the variance seen in these neurons reflects, in part, the result of experience-dependent plasticity. Therefore, this variability may be a manifestation of compensatory mechanisms that allow nervous systems to maintain stable function over time.

There also is a growing body of evidence from experiments that manipulate the excitability of a neuron and look for compensatory shifts in membrane conductances that allow the neuron to maintain stable output properties. In neurons of the crustacean stomatogastric ganglion, overexpression of the channel responsible for a transient  $\text{K}^+$  current ( $I_A$ ) leads to a

drastic increase in the measurable membrane current, but very little effect on the output of the neuron (MacLean et al., 2005; MacLean et al., 2003). This is the result of a concomitant and compensatory increase in the hyperpolarization-activated inward current ( $I_H$ ). Interestingly, this apparent compensation is not a two-way street: overexpression of  $I_H$  is not accompanied by an increase in  $I_A$ , and subsequently the output of the neuron is altered (Zhang et al., 2003). A similar compensation is thought to occur for calcium currents in basal forebrain neurons (Etheredge et al., 2005). Mutant mice with decreased levels of  $\text{Ca}_v2.1$  channel function show relatively normal levels of overall calcium current densities due to upregulation of  $\text{Ca}_v1$  calcium channel function. In fact, the ability of neurons to increase their excitability in response to decreased levels of excitation is becoming well-established: voltage gated sodium channels are up-regulated in both hippocampal slice cultures (Aptowicz et al., 2004) and motor neurons of *Drosophila* in response to activity deprivation (Mee et al., 2004). Cellular mechanisms also exist that decrease neuronal excitability in the face of increased excitatory synaptic drive (van Welie et al., 2004) or decreased inhibitory synaptic activity (Brickley et al., 2001).

Taken together, these results suggest that in addition to the many forms of cellular plasticity in the nervous system that allow such processes as learning and memory to take place, there also are mechanisms that stabilize and maintain nervous system function over time. However, we know little about the

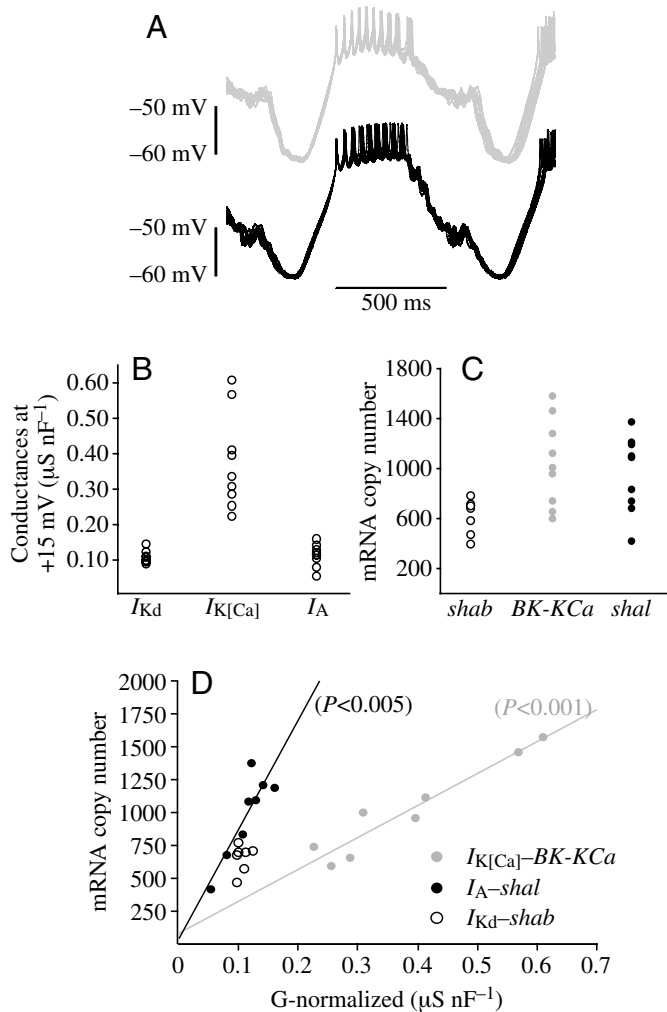

Fig. 3. Variable membrane conductance and ion channel expression in single lateral pyloric (LP) neurons of the crab stomatogastric ganglion. (A) Two LP neurons from two different animals show robust conservation of output. (B) Two-electrode voltage clamp measures of three  $K^+$  conductances ( $I_{Kd}$ =delayed rectifier,  $I_{K[Ca]}$ =calcium-activated  $K^+$ ,  $I_A$ =fast-transient A-type) in LP neurons from nine different animals reveals that neurons with functionally similar outputs show highly variable levels of membrane conductances. (C) Quantitative PCR measures of expression of three  $K^+$  channels that carry the conductances measured in Fig. 3B (*shab* [ $I_{Kd}$ ], *BK-KCa* [ $I_{K[Ca]}$ ], *shal* [ $I_A$ ]) in the same LP neurons. The same level of variability exists at the level of gene expression and membrane conductance. These data combined with correlations between measured membrane conductance and ion channel expression in LP neurons of the crab (D) demonstrate that this variability is biologically meaningful and not the result of 'noise' in either the voltage clamp recordings or the quantitative analyses of gene expression. These data suggest that these neurons continually adjust their intrinsic properties *via* activity-dependent processes in order to maintain consistent functional output. Figure adapted from Schulz et al. (Schulz et al., 2006) and reproduced with permission. LP recordings courtesy of J.-M. Goaillard.

long-term effects of these compensatory mechanisms. The implications for human health are becoming more apparent as we understand more about the nature of compensation in

neurons and how this may be related to injury and disease processes in the nervous system.

### Recovery and alteration of neural network function following injury

In addition to compensatory mechanisms in response to changes in normal neuronal activity, long-term changes in neuronal excitability have been demonstrated as a response to deafferentation or injury to input pathways to neural circuits. Presumably these changes act as a compensatory mechanism to attempt to restore neural function following injury. In some cases, functional output can be obtained either partially or completely following some form of compensatory processes in these neural networks to accommodate for their radically altered descending inputs.

One of the most dramatic examples of recovery of neural function following deafferentation is in the vestibular system. The vestibular system controls the sense of movement and balance, and is of fundamental importance in the functioning nervous system. In mammals, the vestibular nerve fibers continually discharge, even in the absence of movement, resulting in continuous activity in all neurons of the vestibular nuclei. This spontaneous activity ceases following labyrinthectomy (removal of the inner ear), causing abnormal vestibular reflexes and persistent symptoms of nystagmus (rapid, involuntary eye movements) and abnormalities in posture such as head tilting. Yet remarkably this syndrome gradually abates with time in a process known as 'vestibular compensation,' resulting in reduction of the postural problems and nystagmus, leaving only higher order abnormalities in dynamic vestibular reflexes and cognitive function related to loss of vestibular information (Darlington et al., 2002).

A second example of recovery of function following deafferentation comes from the crustacean stomatogastric ganglion (STG). The modulatory inputs to the STG control the output patterns it produces. If all modulatory inputs to the ganglion are removed, its rhythmic output either stops completely or decreases dramatically in frequency. Although the pyloric rhythm ceases soon after the modulatory inputs are removed, the rhythm spontaneously recovers in the absence of modulators after a period of 2–5 days following deafferentation (Golowasch et al., 1999; Thoby-Brisson and Simmers, 1998). These results suggest that in the absence of the inputs that produce ongoing activity in the STG, these neurons and networks 'retune' themselves so that they are able to produce a virtually normal output.

Both of these examples suggest the existence of a long-term mechanism of stability and homeostasis influenced by the activity of the descending projections. Yet how is this accomplished? In both the STG and the vestibular system, the answer seems to be at least in part due to changes in the intrinsic excitability of the neurons involved in generating the spontaneous activity of these networks. During vestibular compensation in the guinea pig, deafferented neurons of the medial vestibular nucleus show changes in intrinsic excitability

that may underlie the mechanism of recovery of resting activity in these neurons (reviewed by Darlington et al., 2002): these cells have more depolarized resting potentials, changes in input resistance, increases in plateau potentials and changes in spike firing and frequency response. Further, increases in the prevalence of low threshold calcium currents (which contribute to pacemaker activity in these cells) have been demonstrated in labyrinthectomized animals (Ris et al., 2003). In the STG, recovery of rhythmic activity is correlated with changes in membrane conductances consistent with an increase in excitability in the pacemaker neurons, the PD cells. PD cells show decreased  $K^+$  conductances and increased levels of the hyperpolarization activated inward current [ $I_H$ ] (Thoby-Brisson and Simmers, 2002).

Together, these two systems and the changes resulting to the intrinsic properties of their constituent neurons suggest that the recovery of function following deafferentation is at least in part a result of the re-tuning of intrinsic excitability. It should be noted that vestibular compensation and recovery of rhythm in the STG have one striking feature in common: they both occur in cells whose normal pattern of output is spontaneous and continuous firing. One key question for the future is whether these recovery of function paradigms also occur in cells that do not feature continuous activity.

### Future questions

This review has focused on the ability of neurons to alter their intrinsic excitability as a result of activity-dependent processes. These alterations take the form of both plasticity and maintenance of neuronal output. Such phenomena have broad implications for the nervous system, both in terms of our understanding of normal neural function as well as the response to injury and disease. In the following paragraphs, I highlight three broad questions facing future research in this area.

#### *How does a cell achieve a balance between plasticity of excitability and stabilizing compensation?*

The ability of cells to alter their output in response to changing environmental conditions or changing pre-synaptic input is at the root of much of nervous system function, including of course learning and memory. Yet unchecked plasticity could lead to cells being modulated to a point where they no longer are capable of putting forth meaningful output. Therefore, the interplay between these two processes is critical: too much plasticity may lead to chaos, too little restricts an animal's ability to learn and adapt. Understanding this balancing act will allow us extensive insight into the overall workings of neurons and the neural circuits to which they belong.

#### *What are the mechanisms of changes in intrinsic excitability, and over what time scales do they operate?*

Plasticity must occur over different time scales to be effective. Long-term memory requires changes in the output of cells that last days, weeks, or even years. Many of these events

require an interaction with the genome and long-term changes in protein synthesis. Yet short-term adaptation occurs continually as a response to changing environmental conditions, and must act *via* pathways more rapid than gene transcription and translation. While currently little is known about the mechanisms which govern shifts in intrinsic excitability, future work will allow us to determine the direct mechanisms of such plasticity, and also provide insight as to how short-term changes are filtered and prioritized into those that will become long-term changes.

#### *What are the implications of this plasticity for human health?*

Finally, with a new-found understanding of plasticity at the level of neuronal excitability, we may gain further insight as to causes of and treatments for human neurological disease. For example, recent studies suggest that some epilepsies could in part be explained by 'runaway' homeostatic processes induced by damage to afferent pathways (Houweling et al., 2005). Further, knowing that neuronal properties are altered by deafferentation, what are the consequences of these potential changes during spinal cord injury? Will reconnected spinal networks no longer 'understand' the higher order commands they receive because of extensive changes in neuronal and network properties? A more complete understanding of these processes will help to shed light on some of the most debilitating neurological issues facing human health.

I would like to thank L. C. Schulz and M. Garcia for reading previous versions of this manuscript. Fig. 2 is adapted from Aizenman et al. (Aizenman et al., 2003) with permission of Elsevier. Fig. 3 is reprinted from Schulz et al. (Schulz et al., 2006) with the permission of the authors.

### References

- Aizenman, C. D. and Linden, D. J. (2000). Rapid, synaptically driven increases in the intrinsic excitability of cerebellar deep nuclear neurons. *Nat. Neurosci.* **3**, 109-111.
- Aizenman, C. D., Munoz-Elias, G. and Cline, H. T. (2002). Visually driven modulation of glutamatergic synaptic transmission is mediated by the regulation of intracellular polyamines. *Neuron* **34**, 623-634.
- Aizenman, C. D., Akerman, C. J., Jensen, K. R. and Cline, H. T. (2003). Visually driven regulation of intrinsic neuronal excitability improves stimulus detection in vivo. *Neuron* **39**, 831-842.
- Alkon, D. L. (1984). Calcium-mediated reduction of ionic currents: a biophysical memory trace. *Science* **226**, 1037-1045.
- Antonov, I., Antonova, I., Kandel, E. R. and Hawkins, R. D. (2001). The contribution of activity-dependent synaptic plasticity to classical conditioning in Aplysia. *J. Neurosci.* **21**, 6413-6422.
- Aptowicz, C. O., Kunkler, P. E. and Kraig, R. P. (2004). Homeostatic plasticity in hippocampal slice cultures involves changes in voltage-gated  $Na^+$  channel expression. *Brain Res.* **998**, 155-163.
- Armano, S., Rossi, P., Taglietti, V. and D'Angelo, E. (2000). Long-term potentiation of intrinsic excitability at the mossy fiber-granule cell synapse of rat cerebellum. *J. Neurosci.* **20**, 5208-5216.
- Brickley, S. G., Revilla, V., Cull-Candy, S. G., Wisden, W. and Farrant, M. (2001). Adaptive regulation of neuronal excitability by a voltage-independent potassium conductance. *Nature* **409**, 88-92.
- Cudmore, R. H. and Turrigiano, G. G. (2004). Long-term potentiation of intrinsic excitability in LV visual cortical neurons. *J. Neurophysiol.* **92**, 341-348.
- Daoudal, G. and Debanne, D. (2003). Long-term plasticity of intrinsic excitability: learning rules and mechanisms. *Learn. Mem.* **10**, 456-465.

- Darlington, C. L., Dutia, M. B. and Smith, P. F.** (2002). The contribution of the intrinsic excitability of vestibular nucleus neurons to recovery from vestibular damage. *Eur. J. Neurosci.* **15**, 1719-1727.
- Davis, G. W. and Bezprozvanny, I.** (2001). Maintaining the stability of neural function: a homeostatic hypothesis. *Annu. Rev. Physiol.* **63**, 847-869.
- Etheredge, J. A., Murchison, D., Abbott, L. C. and Griffith, W. H.** (2005). Functional compensation by other voltage-gated Ca(2+) channels in mouse basal forebrain neurons with Ca(V)2.1 mutations. *Brain Res.* doi: 10.1016/j.brainres.2005.11.007.
- Frick, A., Magee, J. and Johnston, D.** (2004). LTP is accompanied by an enhanced local excitability of pyramidal neuron dendrites. *Nat. Neurosci.* **7**, 126-135.
- Gainutdinov, K. L., Chekmarev, L. J. and Gainutdinova, T. H.** (1998). Excitability increase in withdrawal interneurons after conditioning in snail. *NeuroReport* **9**, 517-520.
- Golowasch, J., Casey, M., Abbott, L. F. and Marder, E.** (1999). Network stability from activity-dependent regulation of neuronal conductances. *Neural Comput.* **11**, 1079-1096.
- Golowasch, J., Goldman, M. S., Abbott, L. F. and Marder, E.** (2002). Failure of averaging in the construction of a conductance-based neuron model. *J. Neurophysiol.* **87**, 1129-1131.
- Houweling, A. R., Bazhenov, M., Timofeev, I., Steriade, M. and Sejnowski, T. J.** (2005). Homeostatic synaptic plasticity can explain post-traumatic epileptogenesis in chronically isolated neocortex. *Cereb. Cortex* **15**, 834-845.
- Li, C. Y., Lu, J. T., Wu, C. P., Duan, S. M. and Poo, M. M.** (2004). Bidirectional modification of presynaptic neuronal excitability accompanying spike timing-dependent synaptic plasticity. *Neuron* **41**, 257-268.
- Liu, Z., Golowasch, J., Marder, E. and Abbott, L. F.** (1998). A model neuron with activity-dependent conductances regulated by multiple calcium sensors. *J. Neurosci.* **18**, 2309-2320.
- MacLean, J. N., Zhang, Y., Johnson, B. R. and Harris-Warrick, R. M.** (2003). Activity-independent homeostasis in rhythmically active neurons. *Neuron* **37**, 109-120.
- MacLean, J. N., Zhang, Y., Goeritz, M. L., Casey, R., Oliva, R., Guckenheimer, J. and Harris-Warrick, R. M.** (2005). Activity-independent coregulation of IA and Ih in rhythmically active neurons. *J. Neurophysiol.* **94**, 3601-3617.
- Mee, C. J., Pym, E. C., Moffat, K. G. and Baines, R. A.** (2004). Regulation of neuronal excitability through pumilio-dependent control of a sodium channel gene. *J. Neurosci.* **24**, 8695-8703.
- Moody, W. J. and Bosma, M. M.** (2005). Ion channel development, spontaneous activity, and activity-dependent development in nerve and muscle cells. *Physiol. Rev.* **85**, 883-941.
- Moyer, J. R., Jr, Thompson, L. T. and Disterhoft, J. F.** (1996). Trace eyeblink conditioning increases CA1 excitability in a transient and learning-specific manner. *J. Neurosci.* **16**, 5536-5546.
- Petersen, S. A., Fetter, R. D., Noordermeer, J. N., Goodman, C. S. and DiAntonio, A.** (1997). Genetic analysis of glutamate receptors in *Drosophila* reveals a retrograde signal regulating presynaptic transmitter release. *Neuron* **19**, 1237-1248.
- Prinz, A. A., Billimoria, C. P. and Marder, E.** (2003). Alternative to hand-tuning conductance-based models: construction and analysis of databases of model neurons. *J. Neurophysiol.* **90**, 3998-4015.
- Prinz, A. A., Bucher, D. and Marder, E.** (2004). Similar network activity from disparate circuit parameters. *Nat. Neurosci.* **7**, 1345-1352.
- Ris, L., Capron, B., Nonclercq, D., Alexandre, H., Sindic, C., Toubeau, G. and Godaux, E.** (2003). Labyrinthectomy changes T-type calcium channels in vestibular neurons of the guinea pig. *NeuroReport* **14**, 1585-1589.
- Sanchez-Andres, J. V. and Alkon, D. L.** (1991). Voltage-clamp analysis of the effects of classical conditioning on the hippocampus. *J. Neurophysiol.* **65**, 796-807.
- Sandrock, A. W., Jr, Dryer, S. E., Rosen, K. M., Gozani, S. N., Kramer, R., Theill, L. E. and Fischbach, G. D.** (1997). Maintenance of acetylcholine receptor number by neuregulins at the neuromuscular junction in vivo. *Science* **276**, 599-603.
- Schulz, D. J., Goillard, J. M. and Marder, E.** (2006). Variable channel expression in identified single and electrically coupled neurons in different animals. *Nat. Neurosci.* **9**, 356-362.
- Thoby-Brisson, M. and Simmers, J.** (1998). Neuromodulatory inputs maintain expression of a lobster motor pattern-generating network in a modulation-dependent state: evidence from long-term decentralization in vitro. *J. Neurosci.* **18**, 2212-2225.
- Thoby-Brisson, M. and Simmers, J.** (2002). Long-term neuromodulatory regulation of a motor pattern-generating network: maintenance of synaptic efficacy and oscillatory properties. *J. Neurophysiol.* **88**, 2942-2953.
- Thompson, L. T., Moyer, J. R., Jr and Disterhoft, J. F.** (1996). Transient changes in excitability of rabbit CA3 neurons with a time course appropriate to support memory consolidation. *J. Neurophysiol.* **76**, 1836-1849.
- Turrigiano, G. G.** (1999). Homeostatic plasticity in neuronal networks: the more things change, the more they stay the same. *Trends Neurosci.* **22**, 221-227.
- Turrigiano, G. G. and Nelson, S. B.** (2004). Homeostatic plasticity in the developing nervous system. *Nat. Rev. Neurosci.* **5**, 97-107.
- van Welie, I., van Hooft, J. A. and Wadman, W. J.** (2004). Homeostatic scaling of neuronal excitability by synaptic modulation of somatic hyperpolarization-activated Ih channels. *Proc. Natl. Acad. Sci. USA* **101**, 5123-5128.
- Xu, J., Kang, N., Jiang, L., Nedergaard, M. and Kang, J.** (2005). Activity-dependent long-term potentiation of intrinsic excitability in hippocampal CA1 pyramidal neurons. *J. Neurosci.* **25**, 1750-1760.
- Zhang, W. and Linden, D. J.** (2003). The other side of the engram: experience-driven changes in neuronal intrinsic excitability. *Nat. Rev. Neurosci.* **4**, 885-900.
- Zhang, Y., Oliva, R., Gisselmann, G., Hatt, H., Guckenheimer, J. and Harris-Warrick, R. M.** (2003). Overexpression of a hyperpolarization-activated cation current (Ih) channel gene modifies the firing activity of identified motor neurons in a small neural network. *J. Neurosci.* **23**, 9059-9067.
